# Supplementary material for: Endoplasmin Is a Hypoxia-Inducible Endoplasmic Reticulum-Derived Cargo of Extracellular Vesicles Released by Cardiac Cell Lines
Source: MDPI journal article supplement (doi:10.3390/membranes13040431), 2023-04-13

**Figure S1.** Fitting of rat ENPL gene Q66HD0 and mouse P08113

|                      |                                                               |     |
|----------------------|---------------------------------------------------------------|-----|
| sp Q66HD0 ENPL_RAT   | MRVLWVLGLCCVLLTFGFVRADDEVVDGTVEEDLGKSREGSRTDDEVVQREEEAIQLDG   | 60  |
| sp P08113 ENPL_MOUSE | MRVLWVLGLCCVLLTFGFVRADDEVVDGTVEEDLGKSREGSRTDDEVVQREEEAIQLDG   | 60  |
|                      | *****                                                         |     |
| sp Q66HD0 ENPL_RAT   | LNASQIRELREKSEKFAFQAEVNRMMKLIINSLYKNKEIFLRELISNASDALDKIRLISL  | 120 |
| sp P08113 ENPL_MOUSE | LNASQIRELREKSEKFAFQAEVNRMMKLIINSLYKNKEIFLRELISNASDALDKIRLISL  | 120 |
|                      | *****                                                         |     |
| sp Q66HD0 ENPL_RAT   | TDENALAGNEELTVKIKCDREKNLLHVTDGTGVMTREELVKNLGTIAKSGTSEFLNKMTE  | 180 |
| sp P08113 ENPL_MOUSE | TDENALAGNEELTVKIKCDREKNLLHVTDGTGVMTREELVKNLGTIAKSGTSEFLNKMTE  | 180 |
|                      | *****                                                         |     |
| sp Q66HD0 ENPL_RAT   | AQEDGQSTSELIGQFGVGFYSAFLVADKVIVTSKHNNDTQHIWESDSNEFSVIADPRGNT  | 240 |
| sp P08113 ENPL_MOUSE | AQEDGQSTSELIGQFGVGFYSAFLVADKVIVTSKHNNDTQHIWESDSNEFSVIADPRGNT  | 240 |
|                      | *****                                                         |     |
| sp Q66HD0 ENPL_RAT   | LGRGTTITLVLKEEASDYLELDTIKNLVRKYSQFINFPIYVWSSKTETVEEPLLEETAQ   | 300 |
| sp P08113 ENPL_MOUSE | LGRGTTITLVLKEEASDYLELDTIKNLVRKYSQFINFPIYVWSSKTETVEEPLLEETAQ   | 300 |
|                      | *****                                                         |     |
| sp Q66HD0 ENPL_RAT   | EEKEEADDEAAVEEEEEKKPKTKKVEKTVWDWELMNDIKPIWQRPSEVEEDEYKAFYK    | 360 |
| sp P08113 ENPL_MOUSE | EEKEESDDEAAVEEEEEKKPKTKKVEKTVWDWELMNDIKPIWQRPSEVEEDEYKAFYK    | 360 |
|                      | *****                                                         |     |
| sp Q66HD0 ENPL_RAT   | SFSKESDDPMAYIHFTAEGEVTFKSIILFVPTSAPRGLFDEYGSKKSDYIKLYVRRVFITD | 420 |
| sp P08113 ENPL_MOUSE | SFSKESDDPMAYIHFTAEGEVTFKSIILFVPTSAPRGLFDEYGSKKSDYIKLYVRRVFITD | 420 |
|                      | *****                                                         |     |
| sp Q66HD0 ENPL_RAT   | DFHDMMPKYLNFVKGVDSDDLPLNVSRETQQHKLKLVIRKKLVKKTLDMIKKIADKEY    | 480 |
| sp P08113 ENPL_MOUSE | DFHDMMPKYLNFVKGVDSDDLPLNVSRETQQHKLKLVIRKKLVKKTLDMIKKIADKEY    | 480 |
|                      | *****                                                         |     |
| sp Q66HD0 ENPL_RAT   | NDTFWKEFGTNIKLGVIEDHSNRTRLAKLLRFQSSHSTDITSLDQYVERMKEKQDKIYF   | 540 |
| sp P08113 ENPL_MOUSE | NDTFWKEFGTNIKLGVIEDHSNRTRLAKLLRFQSSHSTDITSLDQYVERMKEKQDKIYF   | 540 |
|                      | *****                                                         |     |
| sp Q66HD0 ENPL_RAT   | MAGSSRKEAESSPFVERLLKKGYEVIYLTPEVDEYCIQALPEFDGKRFQNVAKEGVKFDE  | 600 |
| sp P08113 ENPL_MOUSE | MAGSSRKEAESSPFVERLLKKGYEVIYLTPEVDEYCIQALPEFDGKRFQNVAKEGVKFDE  | 600 |
|                      | *****                                                         |     |
| sp Q66HD0 ENPL_RAT   | SEKSKESREATEKEFEPLLNWMKDKALKDKIEKAVVSQRLTESPCALVASQYGWSGNMER  | 660 |
| sp P08113 ENPL_MOUSE | SEKTKESREATEKEFEPLLNWMKDKALKDKIEKAVVSQRLTESPCALVASQYGWSGNMER  | 660 |
|                      | ***                                                           |     |
| sp Q66HD0 ENPL_RAT   | IMKAQAYQTGKDISTNYYASQKKTFEINPRHPLIRDMLRRVKEDEDDKTVMDLAVVLFET  | 720 |
| sp P08113 ENPL_MOUSE | IMKAQAYQTGKDISTNYYASQKKTFEINPRHPLIRDMLRRVKEDEDDKTVMDLAVVLFET  | 720 |
|                      | *****                                                         |     |
| sp Q66HD0 ENPL_RAT   | ATLRSGYLLPDTKAYGDRIERMLRLSLNIDPEAQVEEPEEPEPDTTDDTDDSEQDEEE    | 780 |
| sp P08113 ENPL_MOUSE | ATLRSGYLLPDTKAYGDRIERMLRLSLNIDPEAQVEEPEEPEPDTSEDAEDSEQDEGEE   | 780 |
|                      | *****                                                         |     |
| sp Q66HD0 ENPL_RAT   | TDAGAEETEEETETEKEPTEKDEL 804                                  |     |
| sp P08113 ENPL_MOUSE | MDAGTEETEEETETEKESTEKDEL 802                                  |     |
|                      | ***                                                           |     |

**Figure S2.** DNA sequence of pMAXGFP-ENPL

| pMAXGFP-ENPL | 5954 bp     | DNA         | circular   |             |             |            |
|--------------|-------------|-------------|------------|-------------|-------------|------------|
| 1            | TCAATATTGG  | CCATTAGCCA  | TATTATTCAT | TGGTTATATA  | GCATAAAATCA | ATATTGGCTA |
| 61           | TTGGCCATTG  | CATACGTTGT  | ATCTATATCA | TAATATGTAC  | ATTTATATTG  | GCTCATGTCC |
| 121          | AATATGACCG  | CCATGTTGGC  | ATTGATTATT | GACTIONTAT  | TAATAGTAAT  | CAATTACGGG |
| 181          | GTCATTAGTT  | CATAGCCCAT  | ATATGGAGTT | CCGCGTTACA  | TAACCTACGG  | TAAATGGCCC |
| 241          | GCCTGGCTGA  | CCGCCAACG   | ACCCCCGCC  | ATTGACGTCA  | ATAATGACGT  | ATGTTCCCAT |
| 301          | AGTAACGCCA  | ATAGGGACTT  | TCCATTGACG | TCAATGGGTG  | GAGTATTTAC  | GGTAAACTGC |
| 361          | CCCTAACGCA  | GTACATCAAG  | TGTATCATAT | GCCAAAGTCCG | CCCCATTATG  | ACGTCAATGA |
| 421          | CGGTAAATGG  | CCCGCTGGC   | ATTATGCCCA | GTACATGACC  | TTACGGGACT  | TTCTACTTTG |
| 481          | GCAGTACATC  | TACGTATTAG  | TCATCGCTAT | TACCATGGTG  | ATGCGGTTTT  | GGCAGTACAC |
| 541          | CAATGGGCGT  | GGATAGCGGT  | TTGACTCACG | GGGATTTCCA  | AGTCTCCACC  | CCATTGACGT |
| 601          | CAATGGGAGT  | TTGTTTTGGC  | ACCAAATCA  | ACGGGACTTT  | CCAAATGTC   | GTAATAACCC |
| 661          | CGCCCCGTTG  | ACGCAAATGG  | GCGGTAGGCG | TGTACGGTGG  | GAGGTCTATA  | TAAGCAGAGG |
| 721          | TCGTTTAGTG  | AACCGTCAGA  | TCACTAGTAG | CTTTATTGCG  | GTAGTTTATC  | ACAGTTAAAT |
| 781          | TCCTAACGCA  | GTACGTGCTC  | GACTGATCAC | AGGTAAGTAT  | CAAGGTTACA  | AGACAGGTTT |
| 841          | AAGGAGGCCA  | ATAGAAACTG  | GGCTTGTCGA | GACAGAGAAG  | ATTCTTGCGT  | TTCTGATAGG |
| 901          | CACCTATTGG  | TCTTACTGAC  | ATCCACTTTG | CCTTTCTCTC  | CACAGGGGTA  | CCGAAGCCGC |
| 961          | TAGCGTACC   | GGTCGCCACC  | ATGCCGCCCA | TGAAGATCGA  | GTGCCGCATC  | ACCGGCACCC |
| 1021         | TGAACGGCGT  | GGAGTTCGAG  | CTGGTGGGCG | GCGGAGAGGG  | CACCCCCGAG  | CAGGGCCGCA |
| 1081         | TGACCAACAA  | GATGAAGAGC  | ACCAAAGGCG | CCCTGACCTT  | CAGCCCCCTAC | CTGCTGAGCC |
| 1141         | ACGTGATGGG  | CTACGGCTTC  | TACCACTTCG | GCACCTACCC  | CAGCGGCTAC  | GAGAACCCCT |
| 1201         | TCCTGCACGC  | CATCAACAAC  | GGCGGTACAC | CCAACACCCG  | CATCGAGAAG  | TACGAGGACG |
| 1261         | GCGGCGTGCT  | GCACGTGAGC  | TTACAGTACC | GCTACGAGGC  | CGGCCGCGTG  | ATCGGCGACT |
| 1321         | TCAAGTGGT   | GGGCACCGGC  | TTCCCCGAGG | ACAGCGTGAT  | CTTACCGGAC  | AAGATCATCC |
| 1381         | GCAGCAACGC  | CACCGTGGAG  | CACCTGCACC | CCATGGGCGA  | TAACGTGCTG  | GTGGGCAGCT |
| 1441         | TCGCCCCGAC  | CTTCAGCCTG  | CGCGACGGCG | GCTACTACAG  | CTTCGTGGTG  | GACAGCCACA |
| 1501         | TGCACCTCAA  | GAGCGCCATC  | CACCCACAGC | TCCTGCAGAA  | CGGGGGCCCC  | ATGTTCCGCT |
| 1561         | TCCGCGCGCT  | GGAGGAGCTG  | CACAGCAACA | CCGAGCTGGG  | CATCGTGGAG  | TACCAGCACG |
| 1621         | CCTTCAAGAC  | CCCCATCGCC  | TTCCGCCGAG | GGAGTGGGGG  | GGGGTCCGGG  | CTCGAGATGC |
| 1681         | GCGTCTCTGT  | GGTCTTGGGA  | CTGTGTTGCG | TGCTTCTCAC  | ATTCCGGGTTT | GTGCGAGCAG |
| 1741         | ACGACGAAGT  | AGATGTCGAT  | GGAACGGTCG | AGGAAGACCT  | GGGTAAAGTCC | AGGGAGGGGT |
| 1801         | CACGGACTGA  | CGATGAGGTT  | GTGCAGCGCG | AGGAAGAGGC  | CATACAACCTC | GACGGTCTGA |
| 1861         | ATGCATCCCA  | GATTCGGGAG  | CTGAGAGAGA | AGTCAGAAAA  | GTTTGCATTT  | CAAGCTGAAG |
| 1921         | TTAATAGGAT  | GATGAAGTTG  | ATTATTAAC  | CTCTGTACAA  | GAATAAAGAG  | ATCTTCTGTC |
| 1981         | TCGAATTGAT  | CTCCAACGCT  | AGCGACGCAC | TGGATAAAAT  | CCGGCTGATA  | TCACGTACCG |
| 2041         | ATGAGAATGC  | CTTGCCCGGT  | AATGAGGAAC | TTACAGTAAA  | GATAAAGTGT  | GACCGAGAGA |
| 2101         | AAAATCTGTT  | GCACGTAACA  | GATACTGGTG | TGGGCATGAC  | TAGAGAAGAA  | TTGGTCAAAA |
| 2161         | ACTTGGGTAC  | CATCGCTAAA  | TCTGGGACAA | GCGAATTTCT  | TAACAAGATG  | ACCGAAGCAC |
| 2221         | AAGAGGACGG  | ACAAAGTACA  | AGCGAACTGA | TCGGACAATT  | CGGGGTGGGG  | TTCTACAGTG |
| 2281         | CATTCTCTGT  | CGCAGACAAG  | GTGATTGTGA | CGAGTAAACA  | CAACAACGAT  | ACTCAGCACA |
| 2341         | TCTGGGAATC  | TGACAGTAAC  | GAATTCAGCG | TCATAGCAGA  | CCCCCGCGGG  | AATACTTTGG |
| 2401         | GGCGGGGGAC  | TACCATTACT  | CTCGTACTCA | AGGAGGAAGC  | CTCCGATTAC  | CTTGAGCTTG |
| 2461         | ACACCATAAA  | GAATCTGGTA  | CGGAAGTACA | GTCAATTTAT  | TAATTTCCCT  | ATCTACGTAT |
| 2521         | GGTCAAGCAA  | AACTGAGACG  | GTTGAAGAGC | CTCTGAAGA   | AGATGAGACA  | GCCCAAGAAG |
| 2581         | AAAAGGAAGA  | GGCAGATGAC  | GAGGCTGCTG | TTGAGGAGGA  | GGAAGAGGAG  | AAGAAACCAA |
| 2641         | AGACCAAGAA  | GGTGAAAAAG  | ACCGTGTGGG | ATTGGGAGTT  | GATGAATGAT  | ATAAAGCCCA |
| 2701         | TATGGCAGCG  | CCCAAGCAAA  | GAGGTGTAGG | AGGACGAATA  | CAAAGCCTTT  | TATAAGTCAT |
| 2761         | TTAGCAAGGA  | GAGTGATGAC  | CCGATGGCTT | ACATCCATTT  | TACTGCTGAG  | GGTGAGGTGA |
| 2821         | CCTTTAAAAAG | TATATTGTTC  | GTACCCACGA | GTGCCCCTAG  | GGGACTTTTT  | GATGAATACG |
| 2881         | GTAGTAAGAA  | GTCAGACTAC  | ATCAAACTTT | ACGTGAGACG  | GGTTTTTATT  | ACAGATGACT |
| 2941         | TCCACGATAT  | GATGCCTAAA  | TATCTGAATT | TCGTGAAAGG  | CGTGGTTCGAC | TCCGATGATC |
| 3001         | TCCCCCTCAA  | CGTTTCTAGA  | GAGACACTCC | AGCAGCACAA  | ACTTCTTAAG  | GTGATTCGCA |
| 3061         | AGAAGCTTGT  | ACGAAAAGACA | CTCGACATGA | TTAAGAAAAAT | AGCAGACGAA  | AAATATAACG |
| 3121         | ATACTTTCTG  | GAAAGAGTTT  | GGCACAACGA | TTAAGTTGGG  | CGTCATAGAG  | GACCACTCTA |
| 3181         | ACCGGACGCG  | GCTTGCAAAG  | CTCCTGCGAT | TTCAGTCTTC  | TCACCATAGC  | ACCGACATAA |
| 3241         | CATCCCTTGA  | CCAATACGTT  | GAACGCATGA | AAGAGAAGCA  | AGATAAGATT  | TACTTTATGG |
| 3301         | CTGGATCATC  | CCGGAAGGAA  | GCCGAGTCTT | CACCCCTTCGT | TGAGCGACTC  | CTTAAGAAAG |
| 3361         | GCTATGAAGT  | CATCTATCTG  | ACAGAACCAG | TGGATGAGTA  | CTGCATCCAG  | GCACTTCCGG |
| 3421         | AGTTTGACGG  | CAAACGCTTC  | CAAAATGTAG | CAAAAGAAGG  | CGTAAAATTC  | GATGAGAGTG |
| 3481         | AAAAGAGTAA  | GGAGAGCCGA  | GAGGCTACCG | AAAAAGAGTT  | TGAACCACTC  | TTGAACTGGA |
| 3541         | TGAAAGATAA  | AGCATTTGAAG | GACAAGATTG | AAAAAGCTGT  | GGTAAGTCAA  | AGGCTGACGG |
| 3601         | AATCACCTTG  | TGCTCTCGTT  | GCATCTCAGT | ACGGTTGGAG  | TGGAACATG   | GAGAGAATTA |
| 3661         | TGAAAGCACA  | AGCTTATCAG  | ACCGGGAAGG | ATATCAGTAC  | TAATTATTAC  | GCCAGCCAGA |
| 3721         | AGAAGACTTT  | TGAGATAAAT  | CCACGACATC | CGCTTATTAG  | AGATATGCTT  | AGACGGGTCA |
| 3781         | AGGAGGACGA  | GGATGACAAG  | ACAGTGATGG | ATCTTGCACT  | GGTCTCTTTC  | GAAACTGCTA |

3841 CACTCCGGTC AGGATATTTG CTGCCGGATA CGAAAGCATA TGGAGATAGG ATCGAGCGGA  
3901 TGCTGCGCCT GTCACTGAAT ATTGATCCTG AGGCACAAGT TGAGGAAGAG CCCGAGGAAG  
3961 AGCCGGAAGA CACGACCGAA GACACTACGG ACGACAGTGA GCAAGACGAA GAGGAGACCG  
4021 ATGCCGGAGC CGAAGAAGAG GAGGAAGAAC AGGAAACCGA GAAAGAACCT ACTGAGAAAG  
4081 ACGAACTTGG TGGGAGTGGG GGGGGGTCCG GGCTCGAGTG AGAGCTCGAT GAGTTTGGAC  
4141 AAACCACAAC TAGAATGCAG TGAAAAAAT GCTTTATTTG TGAAATTTGT GATGCTATTG  
4201 CTTTATTTGT AACCATTATA AGCTGCAATA AACAAGTTAA CAACAACAAT TGCATTCAAT  
4261 TTATGTTTCA GGTTCAGGGG GAGGTGTGGG AGGTTTTTTA AAGCAAGTAA AACCTCTACA  
4321 AATGTGGTAC TTAAGAGGGG GAGACCAAAG GGCAGACGTA TAAGGCCTCA CGTGACATGT  
4381 GAGCAAAAGG CCAGCAAAAG GCCAGGAACC GTAAAAAGGC CGCGTTGCTG GCGTTTTTCC  
4441 ATAGGCTCCG CCCCCCTGAC GAGCATCACA AAAATCGACG CTCAGTCAG AGGTGGCGAA  
4501 ACCCGACAGG ACTATAAAGA TACCAGGCGT TTCCCCCTGG AAGCTCCCTC GTGCGCTCTC  
4561 CTGTTCCGAC CCTGCCGCTT ACCGGATACC TGTCCGCTT TCTCCCTTCG GGAAGCGTGG  
4621 CGCTTTCTCA TAGCTCACGC TGTAGGTATC TCAGTTCGGT GTAGGTCGTT CGCTCCAAGC  
4681 TGGGCTGTGT GCACGAACCC CCCGTTGAGC CCGACCGCTG CGCCTTATCC GGTAACTATC  
4741 GTCTTGAGTC CAACCCGGTA AGACACGACT TATCGCCACT GGCAGCAGCC ACTGGTAACA  
4801 GGATTAGCAG AGCGAGGTAT GTAGGCGGTG CTACAGAGTT CTTGAAGTGG TGGCCTAAT  
4861 ACGGTACAC TAGAAGGACA GTATTTGGTA TCTGCGCTCT GCTGAAGCCA GTTACCTTCG  
4921 GAAAAAGAGT TGGTAGCTCT TGATCCGGCA AACAAACCAC GCTGGTAGCG GTGGTTTTTT  
4981 TGTTTGCAAG CAGCAGATTA CGCGCAGAAA AAAAGGATCT CAAGAAGATC CTTTGATCTT  
5041 TTCTACGGGG TCTGACGCTC AGTGAACGA AAATCACGT TAAGGGATTT TGGTCATGCC  
5101 GTCTCAGAAG AACTCGTCAA GAAGCGGATA GAAGCGGATG CGCTGCGAAT CGGGAGCGGC  
5161 GATACCGTAA AGCACGAGGA AGCGGTCAGC CCATTCGCCG CCAAGCTCTT CAGCAATATC  
5221 ACGGGTAGCC AACGCTATGT CCTGATAGCG GTCCGCCACA CCCAGCCGGC CACAGTCGAT  
5281 GAATCCAGAA AAGCGGCCAT TTTCCACCAT GATATTCGGC AAGCAGGCAT CGCCATGGGT  
5341 CACGACGAGA TCCTCGCCGT CGGGCATGCT CGCCTTGAGC CTGGCGAACA GTTCGGCTGG  
5401 CGCGAGCCCC TGATGCTCTT CGTCCAGATC ATCCTGATCG ACAAGACCGG CTTCCATCCG  
5461 AGTACGTGCT CGCTCGATGC GATGTTTCGC TTGGTGGTCG AATGGGCAGG TAGCCGGATC  
5521 AAGCGTATGC AGCCGCCGCA TTGCATCAGC CATGATGGAT ACTTTCTCGG CAGGAGCAAG  
5581 GTGAGATGAC AGGAGATCCT GCCCCGGCAC TTCGCCAAT AGCAGCCAGT CCCTTCCCGC  
5641 TTCAGTGACA ACGTCGAGCA CAGCTGCGCA AGGAACGCCC GTCGTGGCCA GCCACGATAG  
5701 CCGCGCTGCC TCGTCTTGCA GTTCATTGAG GGCACCGGAC AGGTCGGTCT TGACAAAAAG  
5761 AACC GGCGC CCCTGCGCTG ACAGCCGGAA CACGGCGGCA TCAGAGCAGC CGATTGTCTG  
5821 TTGTGCCCAG TCATAGCCGA ATAGCCTCTC CACCCAAGCG GCCGAGAAAC CTGCGTGCAA  
5881 TCCATCTTGT TCAATCATAA TATTATTGAA GCATTTATCA GGGTTCGTCT CGTCCCGGTC  
5941 TCCTCCCATG CATG

**Figure S3.** Total lipid content of the sEV and mEV samples were measured by sulfo-phospho vanillin (SPV) lipid assay. Red curve represents 1  $\mu\text{g}$  total lipid content. Samples that contained at least 1  $\mu\text{g}$  lipid were used for further investigation.

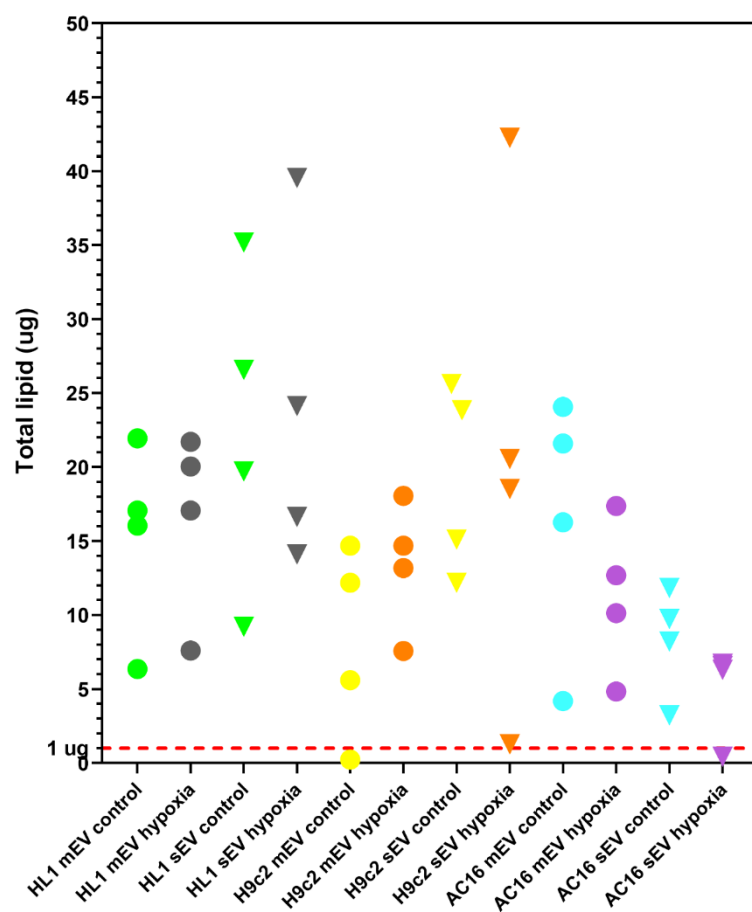

**Figure S4.** ER resident protein (ENPL, grp78 and calnexin) in different EV resources based on Vesiclepedia database (<http://microvesicles.org/index.html>). The most relevant dataset is the human (a) where at least 49 different EV type contained ER resident proteins while the mouse (b) and rat (c) database contained less available data.

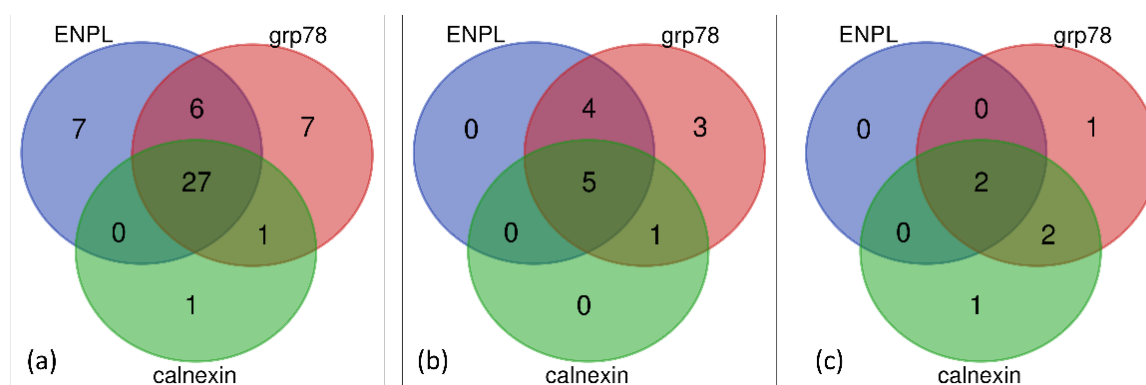

Supplement: s1 [file s1]
