# Supplementary material for: Endoplasmin Is a Hypoxia-Inducible Endoplasmic Reticulum-Derived Cargo of Extracellular Vesicles Released by Cardiac Cell Lines
Source: MDPI journal article supplement (doi:10.3390/membranes13040431), 2023-04-13
Supplement: s1 [file s1]

**Table S1.** Viability% of the control and hypoxia treated cells measured by trypan blue dye exclusion test (Mean  $\pm$  SD values are shown with n=4 biological replicates).

| Samples      | Viability<br>(mean $\pm$ SD) |
|--------------|------------------------------|
| HL1 control  | 94.24 $\pm$ 1.91             |
| HL1 hypoxia  | 94.20 $\pm$ 1.38             |
| H9c2 control | 94.56 $\pm$ 2.42             |
| H9c2 hypoxia | 93.31 $\pm$ 3.88             |
| AC16 control | 87.33 $\pm$ 6.98             |
| AC16 hypoxia | 82.92 $\pm$ 6.11             |

**Table S2.** Viability% of cells with serum starvation compared with differentiated control cells measured by Resazurin Cell Viability Assay. (Mean  $\pm$  SD values are shown with n=3 biological replicates).

| Samples | Viability<br>(mean $\pm$ SD) |
|---------|------------------------------|
| HL1     | 94.65 $\pm$ 0.50             |
| H9c2    | 92.84 $\pm$ 1.99             |
| AC16    | 102.39 $\pm$ 2.17            |

**Table S3.** Antibodies used in our experiments.

| <b>Antibody</b>                                                                  | <b>Manufacturer</b>     | <b>Cat.No.</b> | <b>Clone</b> |
|----------------------------------------------------------------------------------|-------------------------|----------------|--------------|
| rabbit polyclonal anti-CD63 (C-terminal)                                         | Sigma/Merck             | SAB2109138     |              |
| mouse monoclonal anti-CD63                                                       | SantaCruz Biotechnology | MX-49.129.5    | sc-5275      |
| rabbit polyclonal anti-CD81                                                      | Sigma/Merck             | SAB3500454     |              |
| mouse monoclonal anti-CD81                                                       | ThermoFisher            | MA5-13548      | 1.3.3.22     |
| rabbit polyclonal anti-TSG101                                                    | Sigma/Merck             | HPA006161      |              |
| rabbit polyclonal anti-ALIX (C-terminal)                                         | Sigma/Merck             | SAB420047      |              |
| rabbit polyclonal anti-grp94 (C-terminal)                                        | Sigma/Merck             | G4420          |              |
| rabbit polyclonal anti-actin N terminal                                          | Sigma/Merck             | A2103          |              |
| goat-polyclonal anti-PDIA2                                                       | Sigma/Merck             | SAB2501845     |              |
| goat anti-rabbit IgG-ATTO550                                                     | Sigma/Merck             | 43328          |              |
| goat anti-rabbit IgG ATTO488                                                     | Sigma/Merck             | 18772          |              |
| goat anti-mouse IgG CF488                                                        | Sigma/Merck             | 62197          |              |
| goat polyclonal anti-rabbit IgG Fc (HRP)                                         | abcam                   | ab97200        |              |
| goat polyclonal anti-rabbit IgG H&L 10 nm<br>gold pre-adsorbed                   | abcam                   | ab27234        |              |
| goat polyclonal anti-mouse IgG (whole<br>molecule) 5 nm gold pre-adsorbed        | Sigma/Merck             | G7527          |              |
| donkey polyclonal anti-goat IgG (H+L)<br>cross-adsorbed antibody Alexa Fluor 568 | Invitrogen              | A-11057        |              |

**Table S4.** Protein/lipid ratio of H9c2 and AC16 cardiomyocyte-derived mEV and sEV fractions. (Mean  $\pm$  SD values are shown with n=3 biological replicates). EVs released under control and hypoxic conditions, within the same size and origin, do not differ significantly (unpaired student t-tests,  $p>0,05$ ).

| Samples          | P/L ratio (mean $\pm$ SD) |
|------------------|---------------------------|
| H9c2 mEV control | 2.55 $\pm$ 0.05           |
| H9c2 mEV hypoxia | 1.49 $\pm$ 0.94           |
| H9c2 sEV control | 0.84 $\pm$ 0.09           |
| H9c2 sEV hypoxia | 0.81 $\pm$ 0.04           |
| AC16 mEV control | 1.57 $\pm$ 0.32           |
| AC16 mEV hypoxia | 1.98 $\pm$ 0.59           |
| AC16 sEV control | 4.9 $\pm$ 1.19            |
| AC16 sEV hypoxia | 5.33 $\pm$ 0.18           |

Table S5. ER resident proteins in EV, based on Vesiclepedia database

| ER resident proteins         |                               |                                      |                               |                                     |                               |                                       |                               |                                      |                               |                                      |                               |                                      |
|------------------------------|-------------------------------|--------------------------------------|-------------------------------|-------------------------------------|-------------------------------|---------------------------------------|-------------------------------|--------------------------------------|-------------------------------|--------------------------------------|-------------------------------|--------------------------------------|
| ENPL<br>(grp94/gp96/hsp90b1) |                               | grp78<br>(hspa5, BiP, MIF2)          |                               | calnexin<br>(CNX, IP90, P90)        |                               | calreticulin<br>(CRT, RO, SSA, cC1qR) |                               | grp170<br>(Hyou-1)                   |                               | Erp29<br>(PDI-Db, PDIA9, ErP28)      |                               |                                      |
| Sample source                | Sample type                   | Sample source                        | Sample type                   | Sample source                       | Sample type                   | Sample source                         | Sample type                   | Sample source                        | Sample type                   | Sample source                        | Sample type                   |                                      |
| Homo sapiens                 | brain cancer cells            | EV<br>(mEV+sEV)                      | brain cancer cells            | EV<br>(mEV+sEV)                     | brain cancer cells            | EV<br>(mEV+sEV)                       | brain cancer cells            | EV<br>(mEV+sEV)                      | brain cancer cells            | EV<br>(mEV+sEV)                      | brain cancer cells            | EV<br>(mEV+sEV)                      |
|                              | breast cancer cells           | EV<br>(mEV+sEV)                      | breast cancer cells           | EV<br>(mEV+sEV)                     | breast cancer cells           | EV<br>(mEV+sEV)                       | breast cancer cells           | EV<br>(mEV+sEV)                      | breast cancer cells           | EV<br>(mEV+sEV)                      | breast cancer cells           | EV<br>(mEV+sEV)                      |
|                              | bladder cancer cells          | EV<br>(mEV+sEV), EVs (sEV)           | bladder cancer cells          | EV<br>(mEV+sEV), EVs (sEV)          | bladder cancer cells          | EV<br>(mEV+sEV), EVs (sEV)            | bladder cancer cells          | EVs (sEV)                            | bladder cancer cells          | EV<br>(mEV+sEV), EVs (sEV)           | bladder cancer cells          | EV<br>(mEV+sEV), EVs (sEV)           |
|                              | colorectal cancer cells (CRC) | EV<br>(mEV+sEV), mEV, exosomes (sEV) | colorectal cancer cells (CRC) | EV<br>(mEV+sEV), mEV, exosome (sEV) | colorectal cancer cells (CRC) | EV<br>(mEV+sEV), mEV, exosome (sEV)   | colorectal cancer cells (CRC) | EV<br>(mEV+sEV), mEV, exosomes (sEV) | colorectal cancer cells (CRC) | EV<br>(mEV+sEV), mEV, exosomes (sEV) | colorectal cancer cells (CRC) | EV<br>(mEV+sEV), mEV, exosomes (sEV) |
|                              | kidney cancer cells           | EV<br>(mEV+sEV),                     | kidney cancer cells           | EV<br>(mEV+sEV),                    | kidney cancer cells           | EV<br>(mEV+sEV),                      | kidney cancer cells           | EV<br>(mEV+sEV),                     | kidney cancer cells           | EV<br>(mEV+sEV),                     | kidney cancer cells           | EV<br>(mEV+sEV),                     |
|                              | lung cancer cells             | EV<br>(mEV+sEV),                     | lung cancer cells             | EV<br>(mEV+sEV),                    | lung cancer cells             | EV<br>(mEV+sEV),                      | lung cancer cells             | EV<br>(mEV+sEV),                     | lung cancer cells             | EV<br>(mEV+sEV),                     | lung cancer cells             | EV<br>(mEV+sEV),                     |
|                              | melanoma cells                | EV<br>(mEV+sEV), sEV                 | melanoma cells                | EV<br>(mEV+sEV), sEV                | melanoma cells                | EV<br>(mEV+sEV), sEV                  | melanoma cells                | EV (mEV+sEV)                         | melanoma cells                | EV<br>(mEV+sEV), sEV                 | melanoma cells                | EV<br>(mEV+sEV), sEV                 |
|                              | ovarian cancer cells          | EV<br>(mEV+sEV), exosomes (sEV)      | ovarian cancer cells          | exosomes (sEV)                      | ovarian cancer cells          | (mEV+sEV), exosomes (sEV)             | ovarian cancer cells          | EV<br>(mEV+sEV), exosomes (sEV)      | ovarian cancer cells          | EV<br>(mEV+sEV), exosomes (sEV)      | ovarian cancer cells          | EV<br>(mEV+sEV), exosomes (sEV)      |

|                                          |                                                         |                                          |                                                         |                                          |                                                         |                                          |                                  |                                          |                                                         |                                          |                                  |
|------------------------------------------|---------------------------------------------------------|------------------------------------------|---------------------------------------------------------|------------------------------------------|---------------------------------------------------------|------------------------------------------|----------------------------------|------------------------------------------|---------------------------------------------------------|------------------------------------------|----------------------------------|
| prostate cancer cells                    | exosomes (sEV)<br>EV                                    | prostate cancer cells                    | exosomes (sEV)<br>EV                                    | prostate cancer cells                    | exosomes (sEV)<br>EV                                    | prostate cancer cells                    | exosomes (sEV)<br>EV             | prostate cancer cells                    | exosomes (sEV)<br>EV                                    | prostate cancer cells                    | exosomes (sEV)<br>EV             |
| leukemia cells                           | (mEV+sEV),<br>exosomes (sEV),<br>mEV,<br>exosomes (sEV) | leukemia cells                           | (mEV+sEV),<br>exosomes (sEV),<br>mEV,<br>exosomes (sEV) | leukemia cells                           | (mEV+sEV),<br>exosomes (sEV),<br>mEV,<br>exosomes (sEV) | leukemia cells                           | EV (mEV+sEV)                     | leukemia cells                           | (mEV+sEV),<br>exosomes (sEV),<br>mEV,<br>exosomes (sEV) | leukemia cells                           | EV (mEV+sEV),<br>exosomes (sEV)  |
| glioblastoma cells                       | mEV,<br>exosomes (sEV)                                  | glioblastoma cells                       | mEV,<br>exosomes (sEV)                                  | glioblastoma cells                       | mEV,<br>exosomes (sEV)                                  | glioblastoma cells                       | mEV,<br>exosomes (sEV)           | glioblastoma cells                       | mEV,<br>exosomes (sEV)                                  | glioblastoma cells                       | mEV,<br>exosomes (sEV)           |
| neuroblastoma cell                       | exosome                                                 | neuroblastoma cell                       | exosome                                                 | neuroblastoma cell                       | exosome                                                 | neuroblastoma cell                       | exosome                          | neuroblastoma cell                       | exosome                                                 | squamous carcinoma cells                 | exosomes (sEV)                   |
| astrocytoma cells                        | EV (mEV+sEV)                                            | medulloblastoma cells                    | exosome (sEV)                                           | astrocytoma cells                        | EV (mEV+sEV)                                            | astrocytoma cells                        | EV (mEV+sEV)                     | astrocytoma cells                        | EV (mEV+sEV)                                            | astrocytoma cells                        | EV (mEV+sEV)                     |
| B-cells                                  | exosomes (sEV),sEV                                      | squamous carcinoma cells                 | exosomes (sEV),                                         | B-cells                                  | sEV                                                     | T-cells                                  | mEV,<br>exosomes (sEV)           | B-cells                                  | exosomes (sEV)                                          | T-cells                                  | exosomes (sEV)                   |
| T-cells                                  | mEV,<br>exosomes (sEV)                                  | osteosarcoma cells                       | matrix vesicles (sEV)                                   | T-cells                                  | mEV,<br>exosomes (sEV)                                  | dendritic cells (THP-1 monocyte derived) | EV (sEV, mEV)                    | T-cells                                  | mEV,<br>exosomes (sEV)                                  | dendritic cells (THP-1 monocyte derived) | EV (sEV, mEV)                    |
| dendritic cells (THP-1 monocyte derived) | EV (sEV, mEV)                                           | astrocytoma cells                        | EV (mEV+sEV)                                            | dendritic cells (THP-1 monocyte derived) | EV (sEV, mEV)                                           | neutrophil granulocytes                  | microparticles (sEV+mEV)         | dendritic cells (THP-1 monocyte derived) | EV (sEV, mEV)                                           | neutrophil granulocytes                  | microparticles (sEV+mEV)         |
| neutrophil granulocytes                  | microparticles (sEV+mEV)                                | B-cells                                  | exosomes (sEV),sEV                                      | neutrophil granulocytes                  | microparticles (sEV+mEV)                                | Monocytes (THP-1)                        | microparticles (mEV)             | neutrophil granulocytes                  | microparticles (sEV+mEV)                                | monocytes (THP-1)                        | microparticles (mEV)             |
| endothelial cells                        | microparticles (mEV+sEV),<br>mEV                        | T-cells                                  | mEV,<br>exosomes (sEV)                                  | endothelial cells                        | EV(sEV),<br>microparticles (mEV+sEV),<br>mEV            | Macrophages (U937)                       | exosomes (sEV)                   | Monocytes (THP-1)                        | microparticles (mEV)                                    | endothelial cells                        | microparticles (mEV+sEV),<br>mEV |
| platelets                                | microparticles (mEV+sEV)                                | dendritic cells (THP-1 monocyte derived) | EV (sEV, mEV)                                           | platelets                                | microparticles (mEV+sEV)                                | endothelial cells                        | microparticles (mEV+sEV),<br>mEV | endothelial cells                        | microparticles (mEV+sEV),<br>mEV                        | platelets                                | microparticles (mEV+sEV)         |

|                                       |                     |                                       |                                        |                                       |                           |                                       |                          |                                      |                           |                                                                    |                                                           |
|---------------------------------------|---------------------|---------------------------------------|----------------------------------------|---------------------------------------|---------------------------|---------------------------------------|--------------------------|--------------------------------------|---------------------------|--------------------------------------------------------------------|-----------------------------------------------------------|
| bronchial epithelial cells            | EV (sEV)            | neutrophil granulocytes               | microparticles (sEV+mEV)               | retinal pigment epithelial cells      | exosomes (sEV)            | platelets                             | microparticles (mEV+sEV) | platelets                            | microparticles (mEV+sEV)  | umbilical cord mesenchymal stem cells                              | mEV                                                       |
| retinal pigment epithelial cells      | exosomes (sEV)      | Monocytes (THP-1)                     | microparticles (mEV)                   | prostate epithelial cells             | exosomes (sEV)            | bronchial epithelial cells            | EV (sEV)                 | bronchial epithelial cells           | EV (sEV)                  | neonatal myoblast cells                                            | mEV and exosomes (sEV)                                    |
| prostate epithelial cells             | exosomes (sEV)      | endothelial cells                     | EV(sEV), microparticles (mEV+sEV), mEV | embryonic kidney cells                | exosomes (sEV)            | retinal pigment epithelial cells      | exosomes (sEV)           | retinal pigment epithelial cells     | exosomes (sEV)            | thymus (human derived thymic tissue)                               | exosomes (sEV)                                            |
| urothelial cells                      | EV (sEV)            | platelets                             | microparticles (mEV+sEV)               | umbilical cord mesenchymal stem cells | mEV                       | prostate epithelial cells             | exosomes (sEV)           | urothelial cells                     | EV (sEV)                  | malignant pleural effusion (non-small lung cancer patient derived) | exosomes microvesicles ectosomes microparticles (mEV+sEV) |
| renal proximal tubule cells           | exosomes            | bronchial epithelial cells            | EV (sEV)                               | mesenchymal stem cells                | mEV, exosomes (sEV)       | keratinocytes                         | exosomes (sEV)           | neonatal myoblast cells              | mEV and exosomes (sEV)    | carotid atherosclerotic plaque                                     | microparticles (mEV)                                      |
| keratinocytes                         | exosomes (sEV)      | retinal pigment epithelial cells      | exosomes (sEV)                         | neonatal myoblast cells               | mEV and exosomes (sEV)    | embryonic kidney cells                | exosomes (sEV)           | thymus (human derived thymic tissue) | exosomes (sEV)            | plasma                                                             | microparticles (sEV+mEV)                                  |
| embryonic kidney cells                | exosomes (sEV)      | prostate epithelial cells             | exosomes (sEV)                         | thymus (human derived thymic tissue)  | exosomes (sEV)            | umbilical cord mesenchymal stem cells | mEV                      | plasma                               | microparticles (sEV+mEV), | urine                                                              | exosomes (sEV)                                            |
| umbilical cord mesenchymal stem cells | mEV                 | urothelial cells                      | EV (sEV)                               | carotid atherosclerotic plaque        | microparticles (mEV)      | placental mesenchymal stem cells      | exosomes (sEV)           | urine                                | exosomes (sEV)            | breast milk                                                        | exosomes (sEV)                                            |
| placental mesenchymal stem cells      | exosomes (sEV)      | embryonic kidney cells                | exosomes (sEV)                         | plasma                                | microparticles (sEV+mEV), | mesenchymal stem cells                | mEV, exosomes (sEV)      | saliva                               | exosomes (sEV)            |                                                                    |                                                           |
| mesenchymal stem cells                | mEV, exosomes (sEV) | umbilical cord mesenchymal stem cells | mEV                                    | urine                                 | exosomes (sEV)            | neonatal myoblast cells               | mEV and exosomes (sEV)   | breast milk                          | EV (sEV)                  |                                                                    |                                                           |

|                                                                    |                                                           |                                                                    |                                                           |             |                |                                                                    |                                                           |
|--------------------------------------------------------------------|-----------------------------------------------------------|--------------------------------------------------------------------|-----------------------------------------------------------|-------------|----------------|--------------------------------------------------------------------|-----------------------------------------------------------|
| neonatal myoblast cells                                            | mEV and exosomes (sEV)                                    | placental mesenchymal stem cells                                   | exosomes (sEV)                                            | breast milk | exosomes (sEV) | thymic TEC cells)                                                  | exosomes (sEV)                                            |
| thymic TEC cells                                                   | exosomes (sEV)                                            | mesenchymal stem cells                                             | mEV, exosomes (sEV)                                       |             |                | thymus (human derived thymic tissue)                               | exosomes (sEV)                                            |
| thymus (human derived thymic tissue)                               | exosomes (sEV)                                            | neonatal myoblast cells                                            | mEV and exosomes (sEV)                                    |             |                | malignant pleural effusion (non-small lung cancer patient derived) | exosomes microvesicles ectosomes microparticles (mEV+sEV) |
| malignant pleural effusion (non-small lung cancer patient derived) | exosomes/microvesicles/ectosomes/microparticles (mEV+sEV) | thymic TEC cells)                                                  | exosomes (sEV)                                            |             |                | plasma                                                             | microparticles (sEV+mEV)                                  |
| carotid atherosclerotic plaque                                     | microparticles (mEV)                                      | thymus (human derived thymic tissue)                               | exosomes (sEV)                                            |             |                | serum (TBC patient)                                                | exosomes (sEV)                                            |
|                                                                    |                                                           | malignant pleural effusion (non-small lung cancer patient derived) | exosomes/microvesicles/ectosomes/microparticles (mEV+sEV) |             |                | urine                                                              | exosomes (sEV)                                            |
| plasma                                                             | microparticles (sEV+mEV)                                  | carotid atherosclerotic plaque                                     | microparticles (mEV)                                      |             |                | saliva                                                             | exosomes (sEV)                                            |
| urine                                                              | exosomes (sEV)                                            |                                                                    | microparticles (sEV+mEV), exosomes (sEV)                  |             |                | breast milk                                                        | exosomes (sEV)                                            |
| saliva                                                             | exosomes (sEV)                                            | plasma                                                             |                                                           |             |                |                                                                    |                                                           |



|                               |                |                |                                          |
|-------------------------------|----------------|----------------|------------------------------------------|
| seminal plasma                | exosomes (sEV) | urine          | exosomes (sEV)                           |
| ascytes (CRC patient derived) | exosomes (sEV) | saliva         | exosomes (sEV)                           |
| breast milk                   | EV (sEV)       | seminal plasma | exosomes (sEV),<br>prostasomes (mEV+sEV) |
|                               |                | breast milk    | EV (sEV)                                 |

Mus  
musculus

|                                  |                   |                                  |                   |                           |                              |                           |                |                                  |                              |                           |                |
|----------------------------------|-------------------|----------------------------------|-------------------|---------------------------|------------------------------|---------------------------|----------------|----------------------------------|------------------------------|---------------------------|----------------|
| breast cancer cells              | exosome (sEV)s    | breast cancer cells              | exosome (sEV)s    | breast cancer cells       | exosome (sEV)s               | brain cancer cells        | exosomes (sEV) | breast cancer cells              | exosome (sEV)s               | breast cancer cells       | exosome (sEV)s |
| melanoma cells                   | EV (mEV + sEV)    | melanoma cells                   | EV (mEV + sEV)    | melanoma cells            | EV (mEV + sEV)               | breast cancer cells       | exosome (sEV)  | melanoma cells                   | EV (mEV + sEV)               | melanoma cells            | EV (mEV + sEV) |
| T-cells                          | exosome (sEV)     | T-cells                          | exosome (sEV)     | fibroblasts               | exosomes (sEV)               | melanoma cells            | EV (mEV + sEV) | fibroblasts                      | exosomes (sEV)               | embryonic fibroblasts     | EV (mEV+sEV)   |
| mast cells                       | exosome (sEV)     | mast cells                       | exosome (sEV)     | embryonic fibroblasts     | exosomes (sEV), EV (mEV+sEV) | embryonic fibroblasts     | (mEV+sEV)      | embryonic fibroblasts            | exosomes (sEV), EV (mEV+sEV) | pancreatic $\beta$ -cells | exosomes (sEV) |
| myeloid derived suppressor cells | exosome (mEV+sEV) | myeloid derived suppressor cells | exosome (mEV+sEV) | pancreatic $\beta$ -cells | exosomes (sEV)               | pancreatic $\beta$ -cells | exosomes (sEV) | myeloid derived suppressor cells | exosome (mEV+sEV)            |                           |                |
| osteoblasts                      | sEV               | osteoblasts                      | sEV               | thymus                    | mEV                          |                           |                |                                  |                              |                           |                |
| fibroblasts                      | exosomes (sEV)    | fibroblasts                      | exosomes (sEV)    |                           |                              |                           |                |                                  |                              |                           |                |

|                       |                              |                           |                |
|-----------------------|------------------------------|---------------------------|----------------|
| embryonic fibroblasts | exosomes (sEV), EV (mEV+sEV) | murine myoblasts          | exosomes (sEV) |
| thymus                | mEV                          | murine myotubes           | exosomes (sEV) |
|                       |                              | embryonic fibroblasts     | EV (mEV+sEV)   |
|                       |                              | oligodendrocytes          | exosomes (sEV) |
|                       |                              | pancreatic $\beta$ -cells | exosomes (sEV) |
|                       |                              | thymus                    | mEV            |

Rattus norvegicus

|                      |                      |                      |                      |                                 |                      |               |                |    |    |    |    |
|----------------------|----------------------|----------------------|----------------------|---------------------------------|----------------------|---------------|----------------|----|----|----|----|
| insulinoma cell line | microparticles (mEV) | insulinoma cell line | microparticles (mEV) | insulinoma cell line            | microparticles (mEV) | hepatocytes   | exosomes (sEV) | NA | NA | NA | NA |
| reticulocytes        | exosomes (sEV)       | hepatocytes          | exosomes (sEV)       | hepatocytes                     | exosomes (sEV)       | reticulocytes | exosomes (sEV) |    |    |    |    |
|                      |                      | retinal glial cells  | exosomes (sEV)       | reticulocytes                   | exosomes (sEV)       |               |                |    |    |    |    |
|                      |                      | reticulocytes        | exosomes (sEV)       | plasma                          | microparticles (sEV) |               |                |    |    |    |    |
|                      |                      | plasma               | microparticles (sEV) | pancreatic adenocarcinoma cells | exosomes (sEV)       |               |                |    |    |    |    |

---
