# Supplementary material for: Endoplasmin Is a Hypoxia-Inducible Endoplasmic Reticulum-Derived Cargo of Extracellular Vesicles Released by Cardiac Cell Lines
Source: MDPI journal article supplement (doi:10.3390/membranes13040431), 2023-04-13
Supplement: s1 [file s1]

# Qualitative Western blotting with purified EV samples

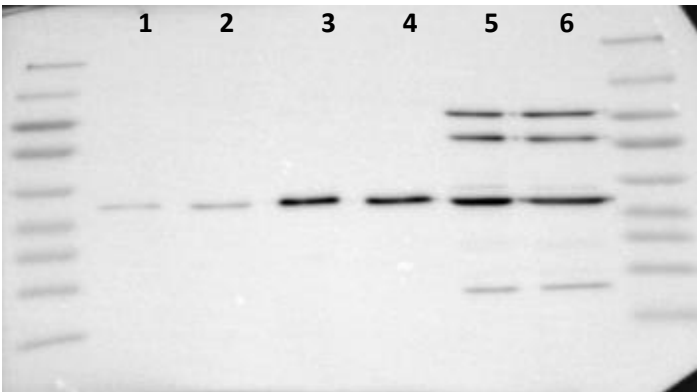

1: HL1K mEV, 2: HL1H mEV, 3: H9c2K mEV, 4: H9c2H mEV, 5:AC16K mEV, 6: AC16H mEV

mEV

ENPL

β-actin

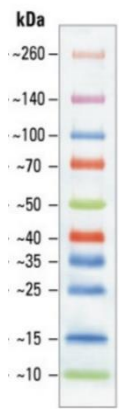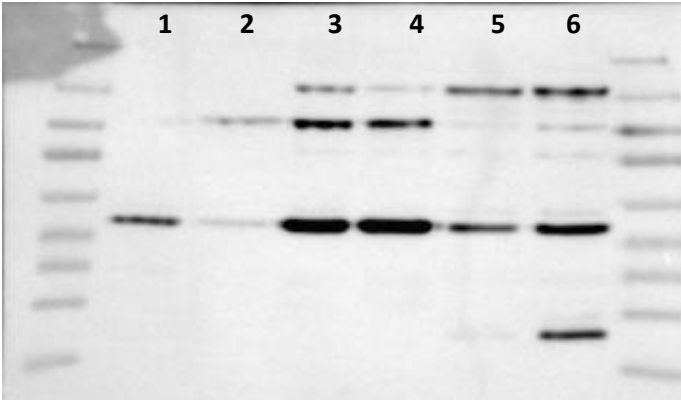

1: HL1K sEV, 2: HL1H sEV, 3: H9c2K sEV, 4: H9c2H sEV, 5:AC16K sEV, 6: AC16H sEV

sEV

ENPL

β-actin

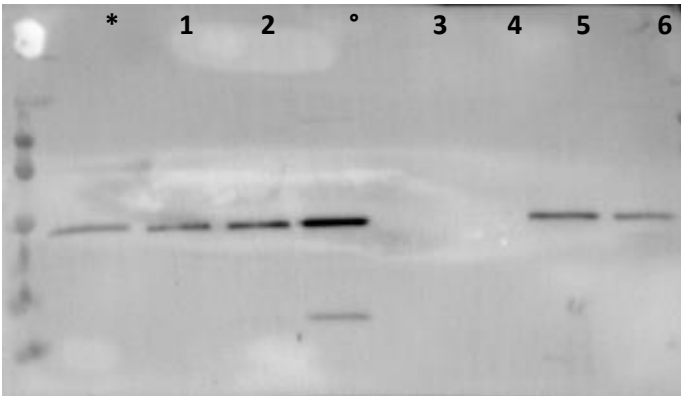

1: HL1K mEV, 2: HL1H mEV, 3: H9c2K mEV, 4: H9c2H mEV, 5:AC16K mEV, 6: AC16H mEV, \* HL1 cell lysate, ° H9c2 cell lysate

mEV

TSG101

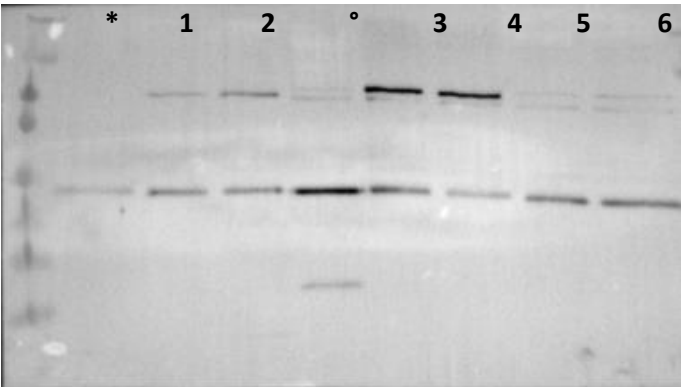

1: HL1K sEV, 2: HL1H sEV, 3: H9c2K sEV, 4: H9c2H sEV, 5:AC16K sEV, 6: AC16H sEV, \* HL1 cell lysate, ° H9c2 cell lysate

sEV

Alix

TSG101

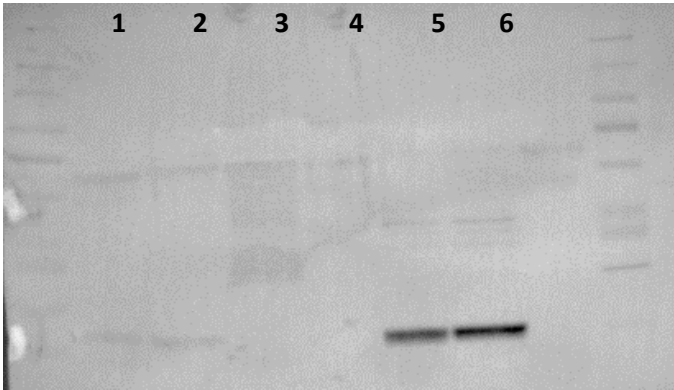

1: HL1K mEV, 2: HL1H mEV, 3: H9c2K mEV, 4: H9c2H mEV, 5:AC16K mEV, 6: AC16H mEV

mEV

CD63

CD81

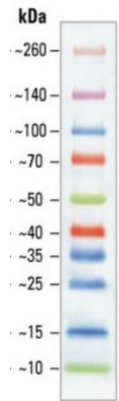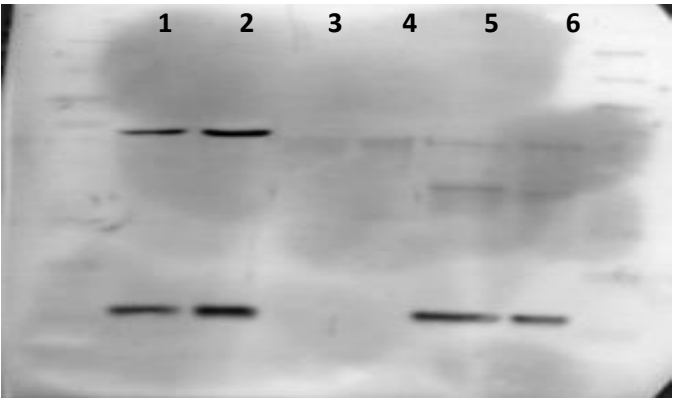

1: HL1K sEV, 2: HL1H sEV, 3: H9c2K sEV, 4: H9c2H sEV, 5:AC16K sEV, 6: AC16H sEV

sEV

CD63

CD81

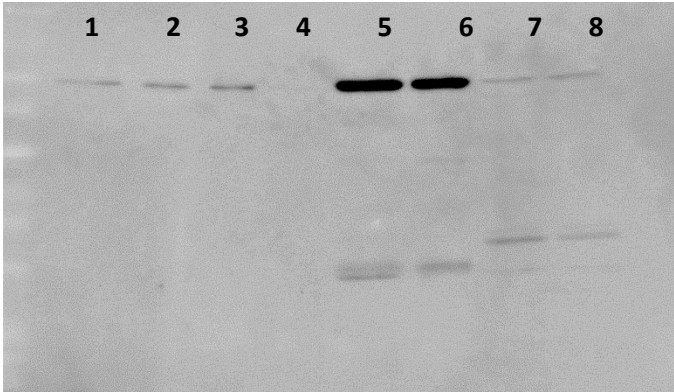

1: HL1K mEV, 2: HL1H mEV, 3: H9c2K mEV, 4: H9c2H mEV, 5:AC16K mEV, 6: AC16H mEV, 7: AC16K sEV, 8: AC16H sEV

mEV

calnexin

syntenin1

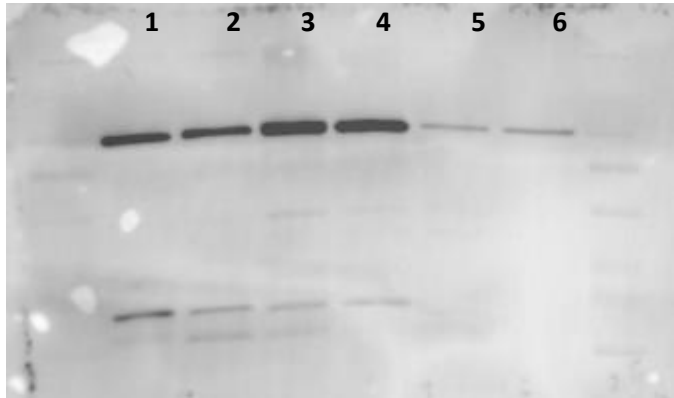

1: HL1K mEV, 2: HL1H mEV, 3: H9c2K mEV, 4: H9c2H mEV, 5:AC16K mEV, 6: AC16H mEV,

sEV

calnexin

syntenin1

# Quantitative Western blotting with conditioned cell culture mediums

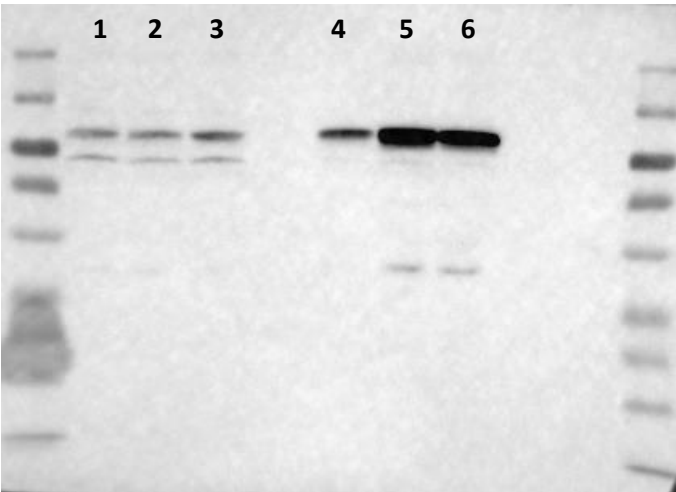

HL1 cell line

ENPL

$\beta$ -actin

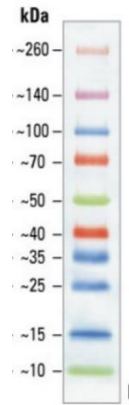

1-3: Biological replicates of control and 4-6 hypoxia treated cultures

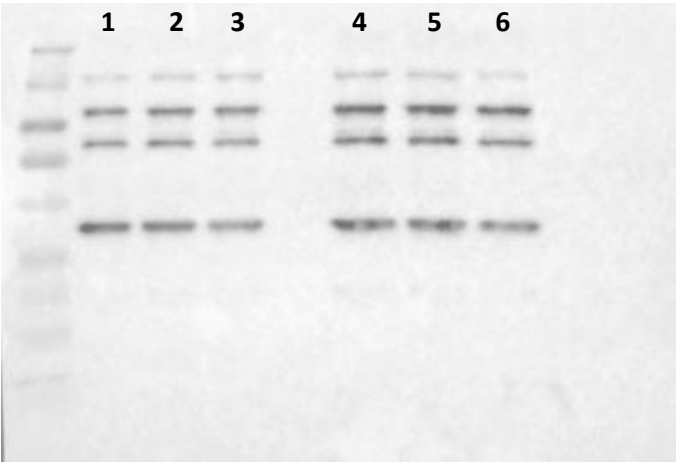

H9c2 cell line

ENPL

$\beta$ -actin

1-3: Biological replicates of control and 4-6 hypoxia treated cultures

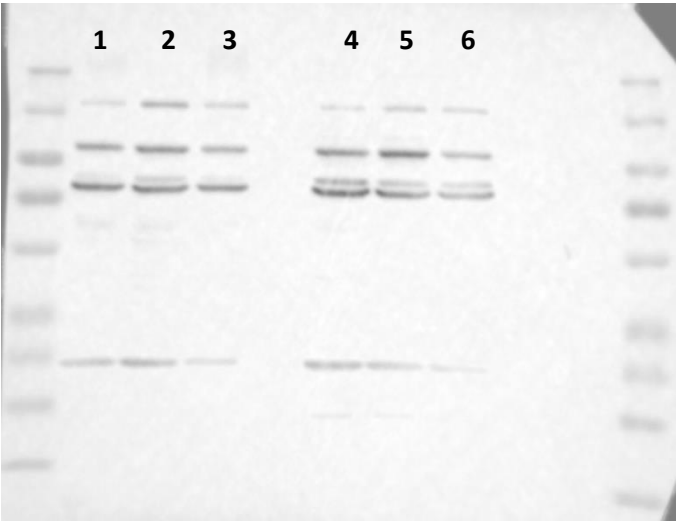

AC16 cell line

ENPL

1-3: Biological replicates of control and 4-6 hypoxia treated cultures
